# Supplementary material for: Brain-targeted enzyme-loaded nanoparticles: A breach through the blood-brain barrier for enzyme replacement therapy in Krabbe disease
Source: PubMed Central journal article supplement — Sci Adv. 2019 Nov 20;5(11):eaax7462. doi: 10.1126/sciadv.aax7462 (PMC6867879; doi:10.1126/sciadv.aax7462), 2019-11-20
Supplement: aax7462_SM.pdf [file aax7462_SM.pdf]

## Supplementary Materials for

### **Brain-targeted enzyme-loaded nanoparticles: A breach through the blood-brain barrier for enzyme replacement therapy in Krabbe disease**

Ambra Del Grosso, Marianna Galliani, Lucia Angella, Melissa Santi, Ilaria Tonazzini, Gabriele Parlanti, Giovanni Signore\*, Marco Cecchini\*

\*Corresponding author. Email: [marco.cecchini@nano.cnr.it](mailto:marco.cecchini@nano.cnr.it) (M.C.); [g.signore@fpscience.it](mailto:g.signore@fpscience.it) (G.S.)

Published 20 November 2019, *Sci. Adv.* **5**, eaax7462 (2019)  
DOI: 10.1126/sciadv.aax7462

#### **This PDF file includes:**

Fig. S1. Intracellular localization of targeted GALC CLEA NPs in WT cells.

Fig. S2. Untreated WT and TWI fibroblasts.

Fig. S3. GALC-loaded NPs activity over time in the presence and absence of serum proteins.

## Confocal Imaging

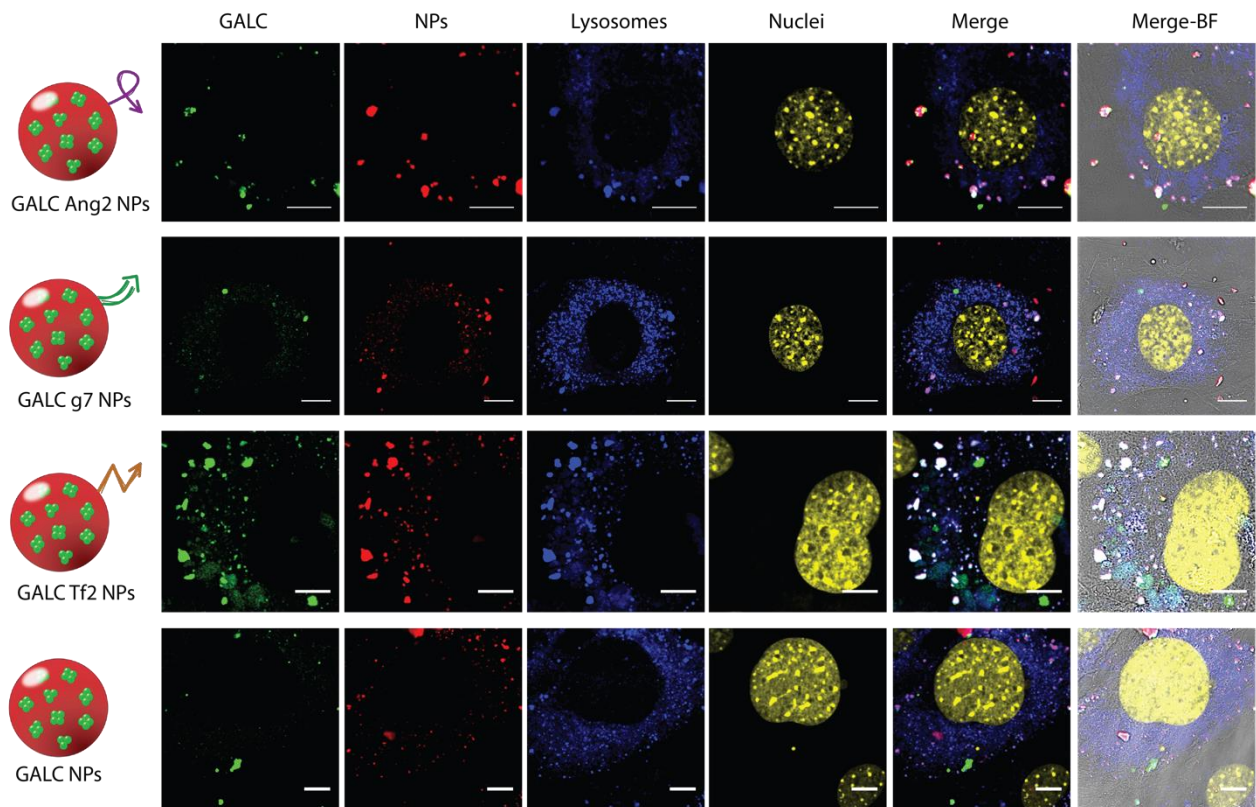

**Fig. S1. Intracellular localization of targeted GALC CLEA NPs in WT cells. Confocal imaging.** Representative confocal images of WT fibroblasts treated with fluorescently labelled GALC Ang2 NPs, GALC g7 NPs, GALC Tf2 NPs or GALC NPs. From the left to the right column: GALC (green, stained with Atto-488), NPs (red, stained with Atto-633), lysosomes (blue, stained with LysoTracker Red DND-99), nuclei (yellow, stained with DAPI), superimposition of GALC, NPs, lysosomes and nuclei fluorescence and superimposition of all channels with brightfield image. Scale bars: 10  $\mu$ m.

## Confocal Imaging

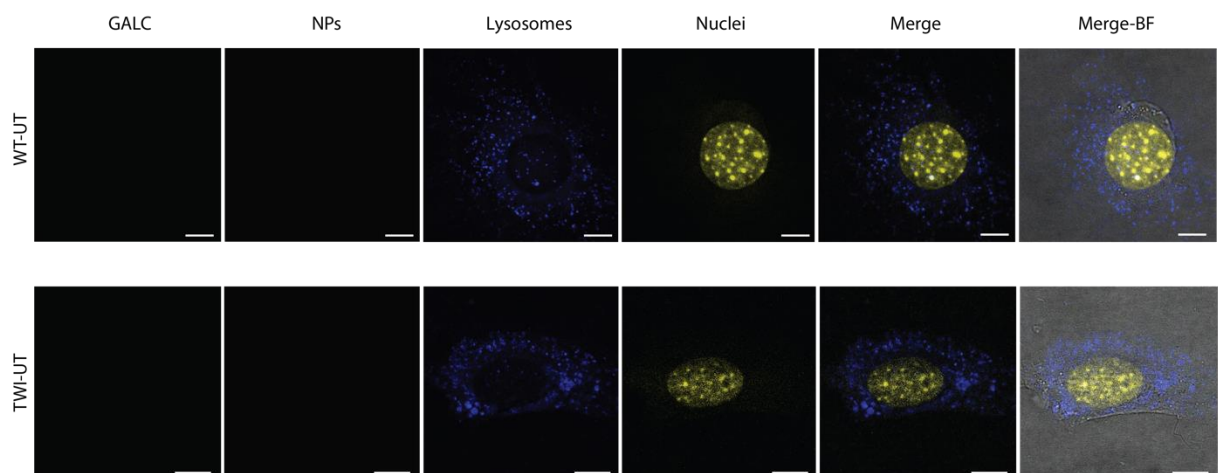

**Fig. S2. Untreated WT and TWI fibroblasts. Confocal imaging.** Representative confocal images of untreated WT and TWI fibroblasts. From the left to the right column: green channel (used for GALC in the treated cells, stained with Atto-488), red channel (used for NPs in the treated cells, stained with Atto-633), lysosomes (blue, stained with LysoTracker Red DND-99), nuclei (yellow, stained with DAPI), superimposition of green channel, red channel, lysosomes and nuclei fluorescence and superimposition of all channels with brightfield image. Scale bars: 10  $\mu$ m.

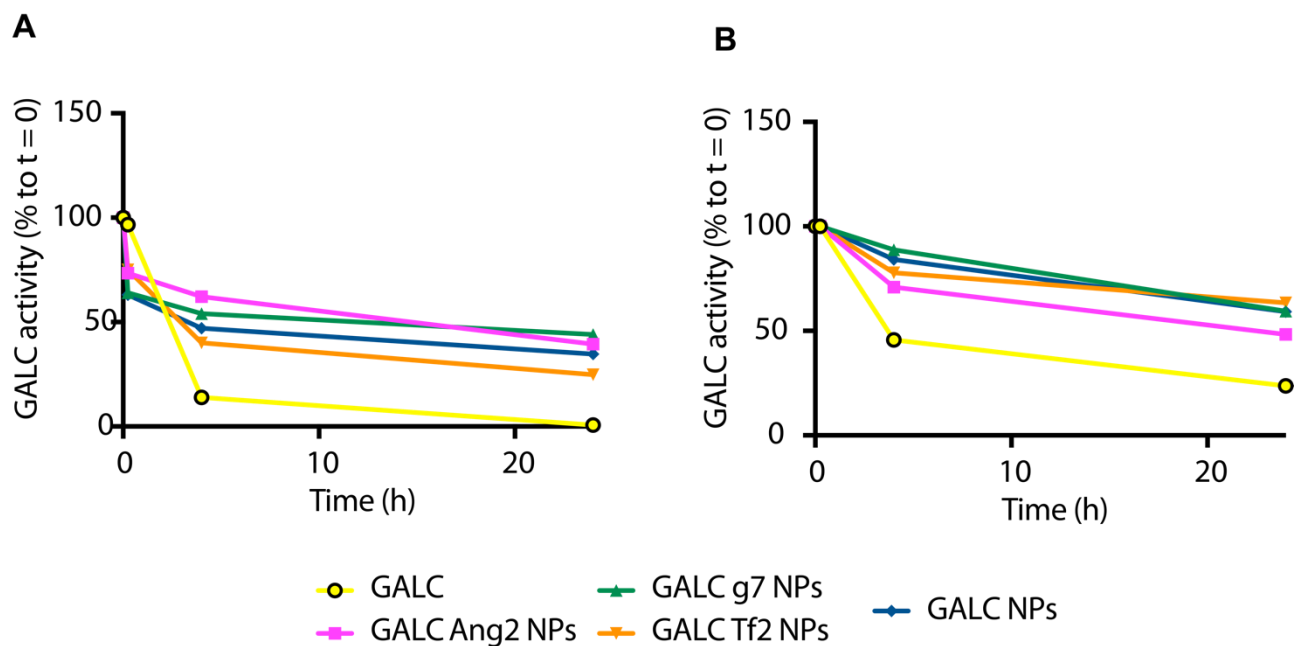

**Fig. S3. GALC-loaded NPs activity over time in the presence and absence of serum proteins.** (A) GALC activity over time upon incubation of free GALC, GALC Ang2 NPs, GALC g7 NPs, GALC Tf2 NPs and GALC NPs in medium containing 50% fetal bovine serum at 37°C and at final GALC concentration 100 U/ml. (B) GALC activity over time upon incubation of free GALC, GALC Ang2 NPs, GALC g7 NPs, GALC Tf2 NPs and GALC NPs in serum protein-free medium (PBS) at 37°C and at final GALC concentration 100 U/ml. Activity is expressed as percentage respect to the activity same sample (free GALC or GALC-loaded NPs) at the same concentration in PBS prior incubation.
